# Supplementary material for: Expanding the simulation of East Asian Super Dust Storm: Physical transport mechanism impacting the Western Pacific
Source: Copernicus journal article supplement (doi:10.5194/egusphere-2023-1245), 2023-07-26
Supplement: Supplementary file [file egusphere-2023-1245-AC1-supplement.pdf]

## **Reply to the comments of RC1**

### **RC1: Overall comment**

Kong et al. present a refined model for simulating the atmospheric transport of dust. The authors new model is an amalgam of two previous iterations (Kong et al. 2021; Liu et al. 2021), finding that the combination of the previous results produces a superior model compared to either of the previous studies alone. Considering the noted improvements, and the possibility of increased extreme weather events in the future (a point that the authors may consider adding as an implication), the submitted manuscript should eventually be published in ACP. However, I do have some minor comments below that should be addressed first.

**Response:** The authors wish to thank the reviewer for his/her compliments, positive and constructive comments of our work. All of the changes in the revised manuscript have been highlighted in **yellow**. Corrections (**blue text**) with line numbers indicated in this response document refer to the revised manuscript.

Our point-by-point responses to the reviewer's comments are given below:

**Comment 1:** General: The figures need to be reordered, as the first figure referred to in the text is Figure 2 (Page 7 Line 172).

**Response:** We thank reviewer for the comment. Figure 1 is referring to the modelling domain, which we have mentioned in Page 4, line 97. Figure 2 shows the time series of measured and simulated PM<sub>10</sub> concentrations at the two measurement sites at Taiwan.

**Comment 2:** General: Figure captions generally lack sufficient detail and definitions.

**Response:** We have revised the captions of Figure 1, Figure 2, Figure 4, Figure 5, Figure 6 and Figure 7 with additional details.

**Comment 3:** General: Can the authors comment on potential interfering species to PM10 concentrations, and how that subsequently affects the resultant simulation (e.g., biological particles)?

**Response:** We thank the reviewer for the comment. During the long range dust transport in this study, mineral dust is the dominant component of the PM<sub>10</sub> concentration. In addition to natural dust, the strong wind could serve to mix in more anthropogenic aerosol pollutant (e.g. black carbon, NO<sub>x</sub> and SO<sub>2</sub>) from China along the transport path towards the downwind region. However, contributions from anthropogenic pollutant were less compared to the dust aerosol concentration along this path particularly during the dust storm episode (Lin et al., 2012). In addition, previous studies showed dust and bioaerosol coexistence has occurred over the Western Pacific region (Iwasaka et al., 2009). About 10 % of the dust particle coated by microorganisms like pollen, bacteria, and plant and animal fragments on its surface, but the components are not embedded within the CMAQ model in this study, thus was assumed minor. We also believe that the marine air over East China Sea could influence the PM10 concentration over the downwind region such as Japan, Taiwan and South China Sea. For instance, the bioaerosols can be either dilute or deposit caused by the water vapour over the marine boundary layer. As a result, even if included in the simulation, the bioaerosol contribution to PM10 would likely be insignificant. As the present research mostly revealed

the special dust transport pattern and dynamics, the mixing process between dust, anthropogenic pollutants, and microorganisms has not been discussed. However, this would be a great research topic to explore going forward.

## References:

- Iwasaka, Y., Shi, GY., Yamada, M. et al. Mixture of Kosa (Asian dust) and bioaerosols detected in the atmosphere over the Kosa particles source regions with balloon-borne measurements: possibility of long-range transport, *Air Quality, Atmosphere & Health* 2, 29–38, <https://doi.org/10.1007/s11869-009-0031-5>, 2009.
- Lin, C., Chou, C. C. K., Wang, Z., Lung, S., Lee, C., Yuan, C., Chen, W., Chang, S., Hsu, S., Chen, W., and Chen, S.: Impact of different transport mechanisms of Asian dust and anthropogenic pollutants to Taiwan, *Atmospheric Environment*, 60, 403–418, <https://doi.org/10.1016/j.atmosenv.2012.06.049>, 2012.

**Comment 4:** Page 7 Lines 172 – 182: I'm not convinced that the interpretation of the data from the Wanli station is appropriate given the signal saturation that is clearly observed for the PM<sub>10</sub> concentrations. Even with the caveats that the authors provide, providing a numerical evaluation of their model (i.e., percent error) compared to the experimental Wanli data is highly misleading. At the very least, I recommend removing any numerical comparison with this result.

**Response:** Agree. Wanli station has been replaced by Shilin station to represent the northern Taiwan region, as Shilin station has a complete dataset during these episodes, was not signal saturated, and was still one of the most affected stations by the extreme event. At the Shilin station, the PM<sub>10</sub> concentrations were 60  $\mu\text{g m}^{-3}$  during 12 UTC 20 March and then peaked at 1517  $\mu\text{g m}^{-3}$  at 5 UTC the next day before decreasing to 60  $\mu\text{g m}^{-3}$  about 19 hours later.

We have replotted Figure 2, recalculated the statistical index in Table 2, and revised the text as follows: “DUST\_Off and DUST\_Default were similarly underestimated (Normalized Mean Bias (NMB) = -64.69 % and -54.09 %, respectively), compared with the observed values, which is consistent with the results of Dong et al. (2016) and Kong et al. (2021) that simulated moderate-intensity dust events. The Dust\_Refined\_1 and Dust\_Refined\_2 simulations exhibited improved accuracy (NMB = -41.18 % and -49.88 %, respectively), highlighting the importance of revising the dust treatment before simulating the SDS event over a downwind region (Kong et al., 2021). Moreover, the NMB for Refined\_1 was lower than Refined\_2 suggesting that simply calibrating the bulk soil density is not as effective as calibrating for soil moisture fraction and dust emission speciation. Eventually, Dust\_Refined\_3 resulted in the best performance (NMB = -30.65 %). Our results indicate the importance of including both calibration methods in order to reduce the model uncertainty.

Figure 2 shows the in-situ and CMAQ-simulated PM<sub>10</sub> concentrations at Shilin station (representing northern Taiwan) and Dongsha Island (representing the northern South China Sea region) during 19-24 March 2010. In both locations, the Dust\_Off trend vastly underestimated the observations, whereas Dust\_Default showed increased PM<sub>10</sub> concentrations but still resulted in an underestimation. The maximum PM<sub>10</sub> concentration at Shilin reached 1517  $\mu\text{g m}^{-3}$ . The CMAQ model predicted a peak PM<sub>10</sub> concentration of 1040.8  $\mu\text{g m}^{-3}$ , thus was 45.8 % lower than the observation result.” **Page 7, Line 161-177.**

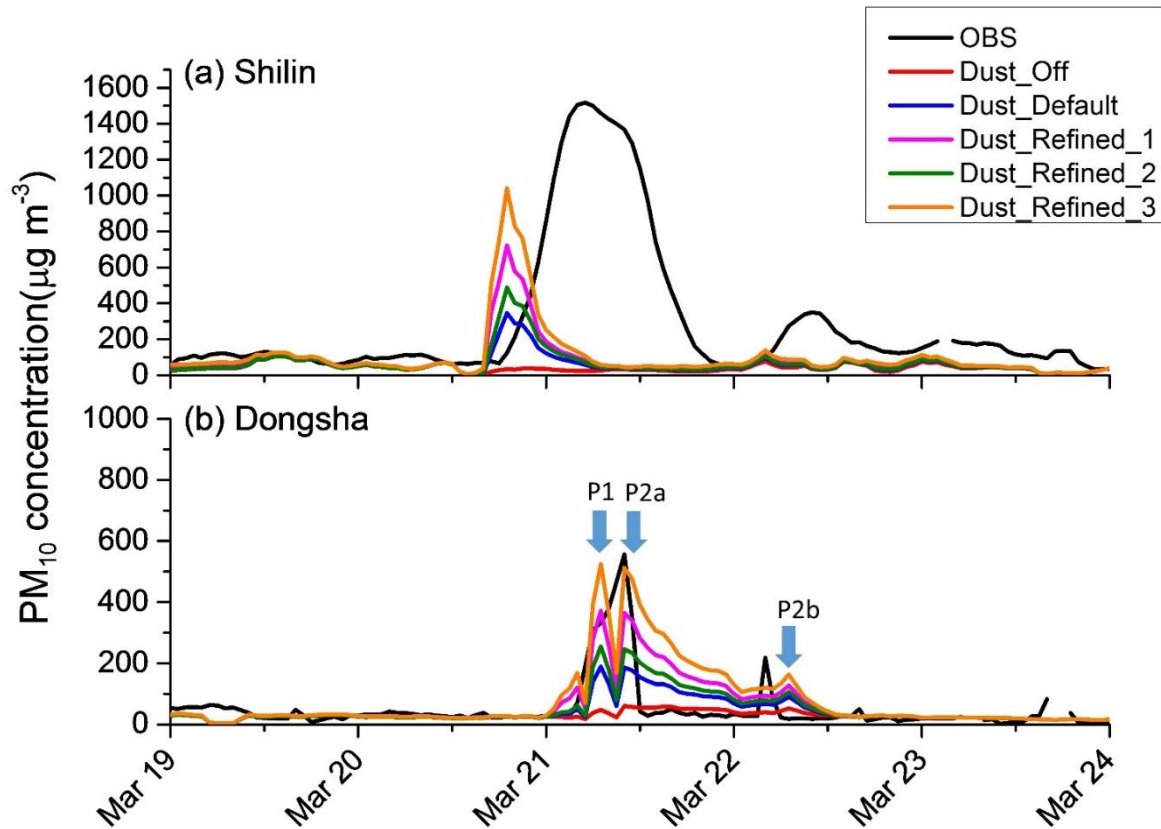

**Figure 2:** Time series of observed and simulated PM<sub>10</sub> concentrations over the Shilin site and Dongsha Island during 19-23 March 2010. P1, P2a and P2b show the peak values of the simulated PM<sub>10</sub> concentrations under the Dust\_Refined\_3 scenario.

**Table 2** Statistical index for PM<sub>10</sub> concentrations during 19-23 March 2010, for Taiwan Island (Shilin, Pinzhen, Hsinchu, Xitun, Xinying, Zhuoyin, Daliao) and Dongsha Island.

|         | Benchmark | Off    | Default | Refined_1 | Refined_2 | Refined_3 |
|---------|-----------|--------|---------|-----------|-----------|-----------|
| MeanObs |           | 178.80 | 178.80  | 178.80    | 178.80    | 178.80    |
| MeanMod |           | 52.05  | 65.77   | 83.20     | 71.65     | 97.31     |
| NMSE    |           | 2.06   | 1.53    | 1.19      | 1.37      | 1.05      |
| MFB     | ± 60%     | -63.10 | -53.32  | -43.09    | -49.94    | -36.63    |
| NMB     | ± 85%     | -64.69 | -54.09  | -41.18    | -49.88    | -30.65    |
| NME     | 85%       | 64.69  | 60.10   | 57.28     | 58.94     | 55.16     |
| FAC2    | 0.5–2.0   | 0.71   | 0.84    | 0.99      | 0.88      | 1.12      |
| R       | > 0.35    | 0.24   | 0.35    | 0.38      | 0.40      | 0.37      |

Note: the definition of the statistical formulas NMSE: Normalized Mean Square Error; MNB: Mean Normalized Bias; NMB: Normalized Mean Bias; NME: Normalized Mean Error; FAC2: Factor of Two; R: Correlation Coefficient.

**Comment 5:** Figure 3: While providing the differences between ‘Dust\_Off’ and other various simulations makes for informative visualizations, it may still be helpful to show the absolute representations (i.e., separate simulations for Dust\_Off, Dust\_Default, Dust\_Refined\_1, Dust\_Refined\_2, and Dust\_Refined\_3) in the supporting information.

**Response:** The separate simulations have been included. We have modified the sentence as “Daily average modeled PM<sub>10</sub> concentration differences between Dust\_Off and other

simulations over the East Asia region during 19-23 March 2010 are shown in Fig. 3, with the corresponding simulated absolute concentrations shown in Fig. S1.” Page 7-8, Line 182-184.

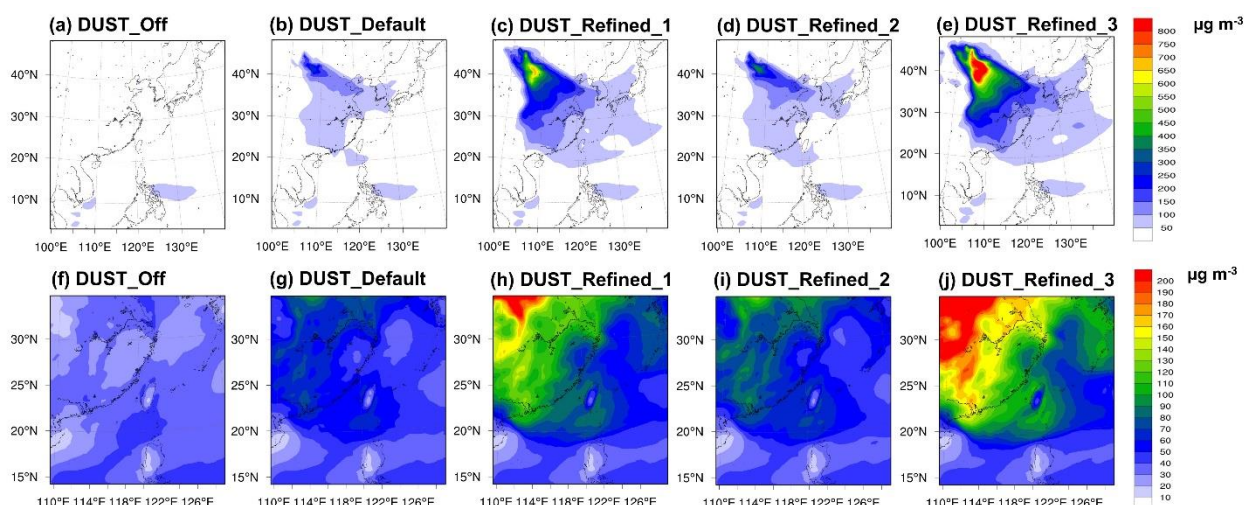

**Figure S1:** Daily average modeled PM<sub>10</sub> concentrations over East Asia under the following simulation scenarios: (a, f) Dust\_Off, (b, g) Dust\_Default\_1, (c, h) Dust\_Refined\_1, (d, i) Dust\_Refined\_2 and (e, j) Dust\_Refined\_3.

**Comment 6:** Page 8 Line 196 – 197: The authors have (perhaps unintentionally) opened up Pandora’s box here: if the MERRA-2 reanalysis is subject to error due to a poorly captured wind component (something the authors postulate as a reason for differences in their simulation over East Asia), should it even then be used to validate their more positive results later on? I pose this as a bit of a rhetorical question. However, the very nature of events that the authors are interrogating surround the issue of wind, and if the method used to establish ground truth (MERRA-2) is subject to wind-related errors, then this should be interrogated further (i.e., to what extent is the use of MERRA-2 as a ground truth appropriate?).

**Response:** We thank the reviewer for the comment. The statement from the 2010 case was meant to highlight the importance of the wind dataset in depicting transboundary dust events over the region. In Section 3.4, we used MERRA-2 to study the impact of typhoon on dust over western Pacific. Since MERRA-2 captured the presence of the typhoon and the typhoon generated extreme wind speeds in the region, the dust pattern influenced by Typhoon was clearly depicted by MERRA-2. Please refer to Figure 11 for MERRA-2 wind speed during the typhoon.

The discussion of the simulated and MERRA-2 wind speed for the 2010 case has been rephrased. We modified the sentences as follows: “Generally, the model-simulated wind speeds were more than  $2 \text{ m s}^{-1}$  greater than MERRA-2 wind speeds across much of East Asia during the SDS event in March 2010 (Fig. S3). Throughout the dust plume arrival to the SCS region, the simulated wind speeds were  $8\text{-}12 \text{ m s}^{-1}$ , while those from MERRA-2 were of much lower magnitude or nearly zero. As a result, the current study emphasizes the importance of the wind dataset to depict transboundary dust events over the region” Page 8, Line 194-199.

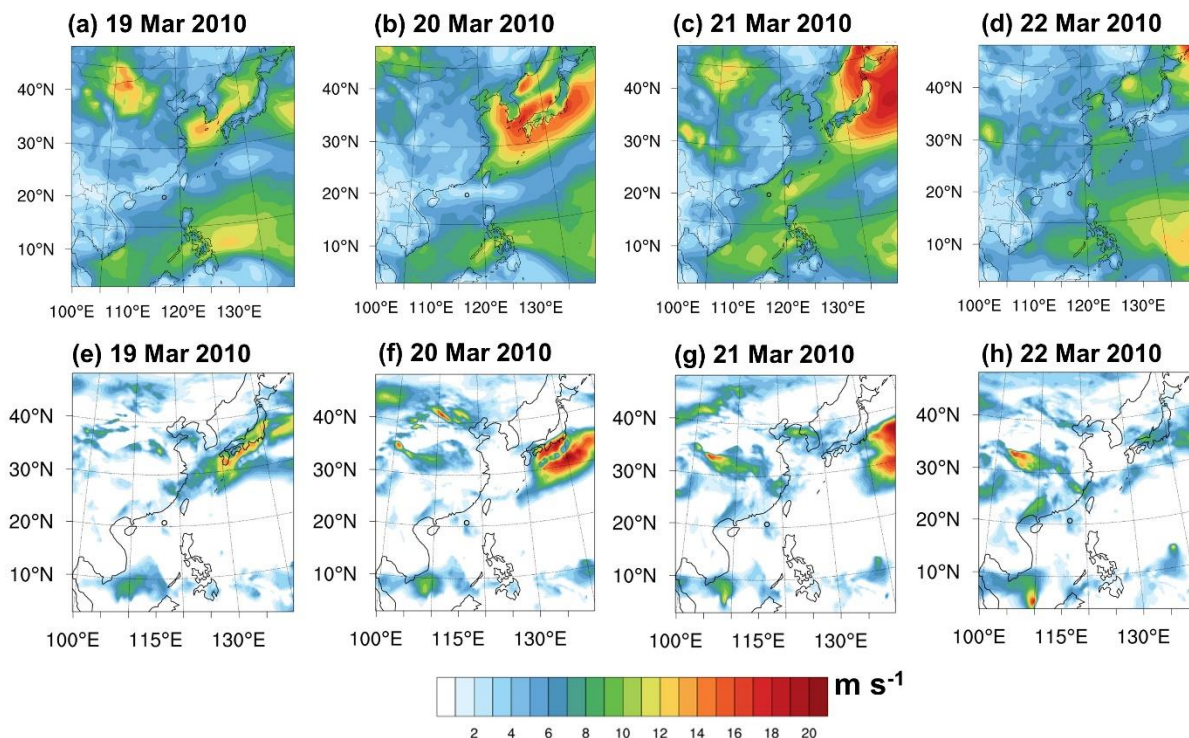

**Figure S3:** Simulated wind speed (upper panel) and MERRA-2 reanalysis wind speed (lower panel) during (a, e) 19 March, (b, f) 20 March, (c, g) 21 March and (d, h) 22 March 2010.

**Comment 7:** Page 8 Line 205: Change ‘Dust\_OFF’ to ‘Dust\_Off’

**Response:** The phase has been changed. We have changed it as “The average AOD value of the DUST\_Refined\_3 yielded an NMB of -16.02 %, which was markedly better than DUST\_Off (-26.09 %), DUST\_Default (-25.24 %), DUST\_Refined\_1 (-19.58 %) and DUST\_Refined\_2 (-24.40 %).” **Page 8, Line 206-208.**

**Comment 8:** Figure 2: Define P1, P2a, and P2b

**Response:** The terms have been defined. We have changed Figure 2’s legend as “**Figure 2:** Time series of observed and simulated PM<sub>10</sub> concentrations over the Shilin site and Dongsha Island during 19-23 March 2010. P1, P2a and P2b show the peak values of the simulated PM<sub>10</sub> concentrations under the Dust\_Refined\_3 scenario.”

**Comment 9:** Figure 4: While the contours may be helpful, the authors more frequently refer to various land masses instead to describe the movement of the dust plume. Therefore, consider replacing the background graphic with one in which the visualization of land masses is more clear.

**Response:** The figure has been replotted with the new background graphic as follow:

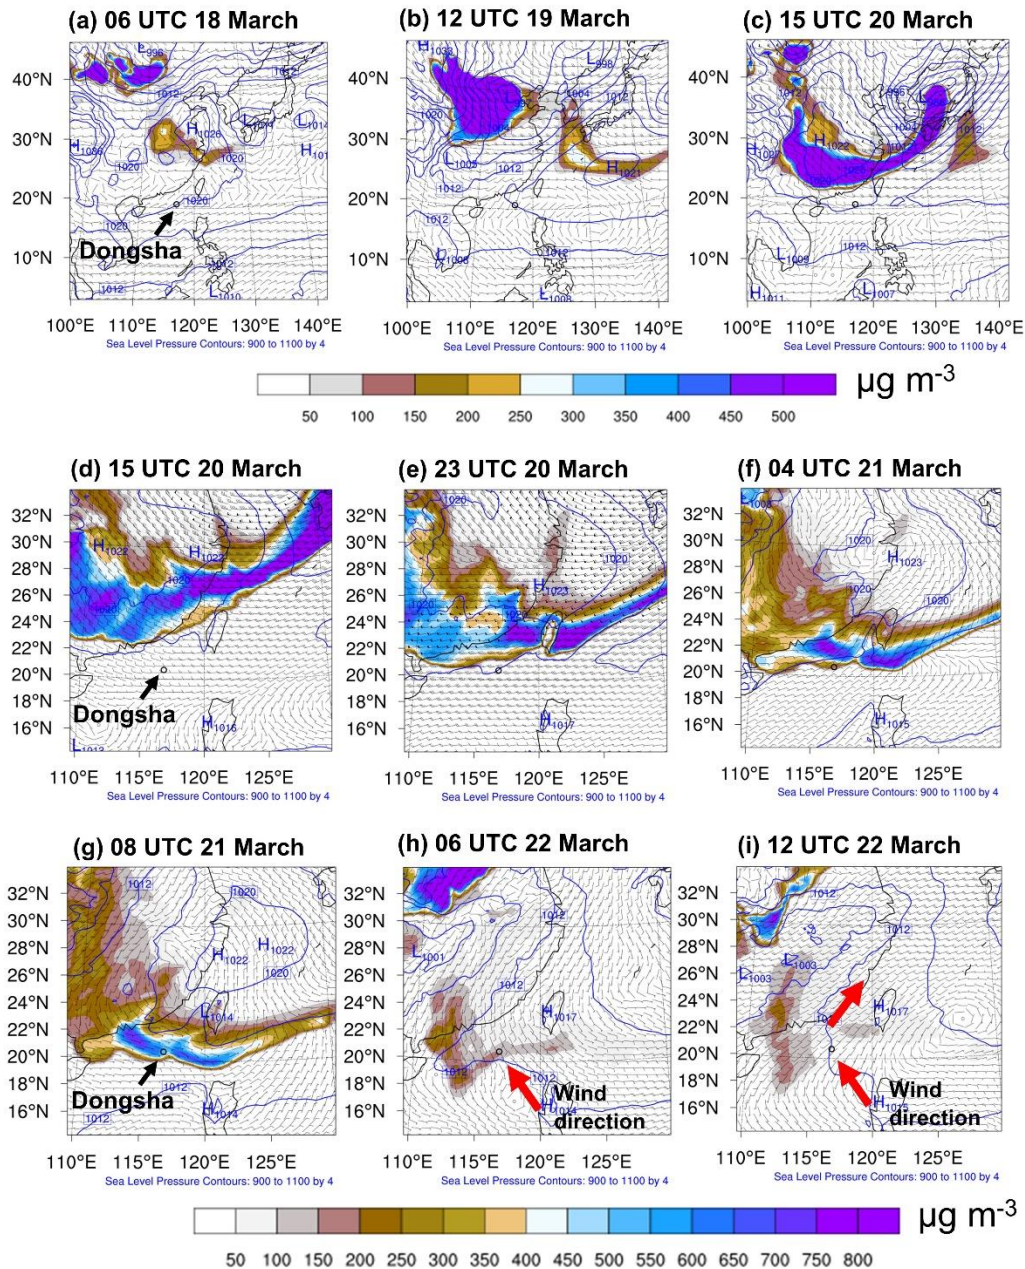

**Figure 4:** Spatial distribution of the simulated dust aerosol during the March 2010 episode over East Asia within domain 1 (d01) at (a) 06 UTC 18 March, (b) 12 UTC 19 March and (c) 15 UTC 20 March; and domain 2 (d02) at (d) 15 UTC 20 March, (e) 23 UTC 20 March, (f) 04 UTC 21 March, (g) 08 UTC 21 March, (h) 06 UTC 22 March and (i) 12 UTC 22 March. Location of Dongsha is indicated with a black dot. The red arrows highlights the wind direction.

**Comment 10:** Figures 4 and 5: Consider combining these figures together, both for the sake of simplified visualization and simplified references within the text. For example, the prose on page 9 seems to present these figures as two distinct talking points despite the high degree of similarity in the provided information.

**Response:** The previous Figure 4 and 5 has been merged. Please see Figure 4 under the response to Comment #9.

**Comment 11:** Figure 5: There are various green and red arrows on the different tiles. The significance of these need to be described via a legend and within the figure caption.

**Response:** The red arrow has been described via a legend and within the figure caption. Please see Figure 4 under the response to Comment #9.

**Comment 12:** Figure 6: Both axes needs to be defined (i.e., need labels), and the x-axis readability needs to be improved.

**Response:** The axes of the figure (now Figure 5) have now been defined. We have replotted the figure as follow:

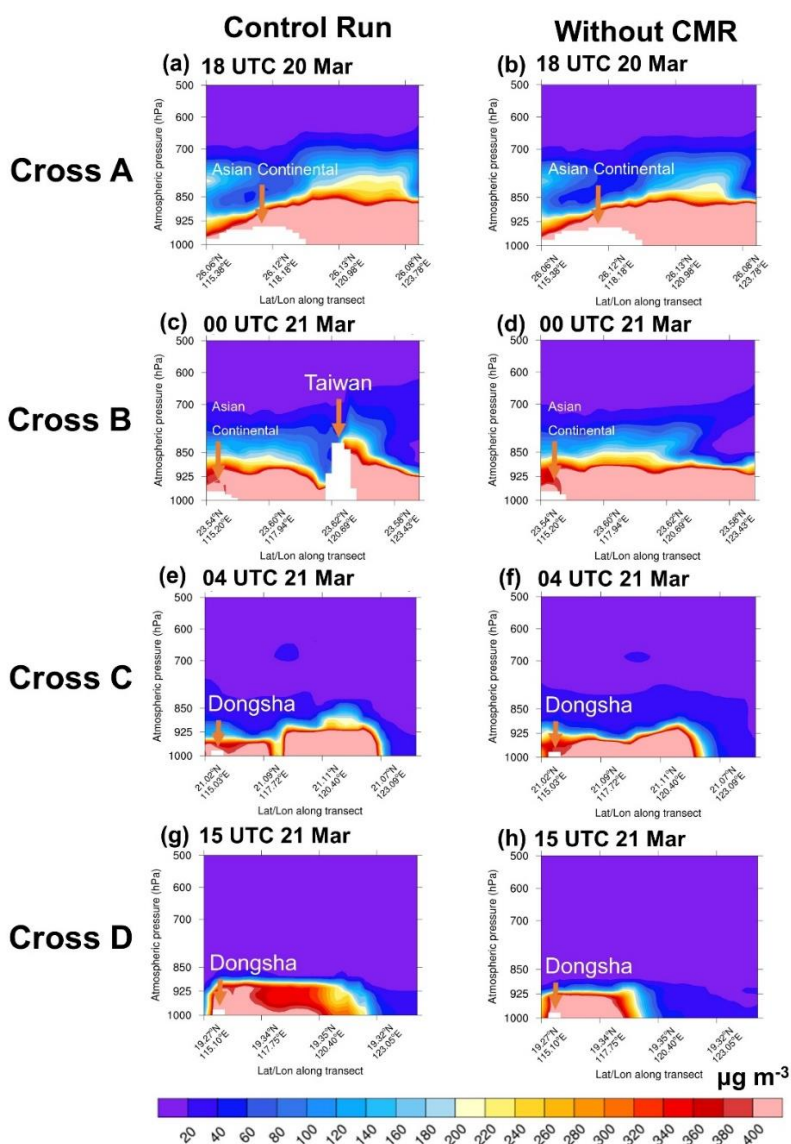

**Figure 5:** Vertical profile of dust aerosol for the CMAQ simulation of (a, c, e, g) control run and (b, d, f, h) without CMR at (a, b) 18 UTC 20 March, (c, d) 00 UTC 21 March, (e, f) 04 UTC 21 March and (g, h) 15 UTC 21 March 2010.
